# Supplementary material
Source: MDPI journal article supplement (https://www.mdpi.com/2076-3417/13/24/13189)
Supplement: s1 [file s1]

SUPPLEMENTARY DATA FOR “Parallax of Head-Up Displays and Visual Safety for Driving”

**Table S1.** Data for Figure 9, Trends in VAS–F and VFS questionnaire scores under overall horizontal parallax conditions.

|              | Parallax (Mean ± standard deviation) |             |            |             |             |             |             | <i>F</i> | <i>p</i> |
|--------------|--------------------------------------|-------------|------------|-------------|-------------|-------------|-------------|----------|----------|
|              | 0.0(n=17)                            | 1.65(n=17)  | 3.31(n=17) | 6.24(n=17)  | 10.61(n=17) | 13.67(n=17) | 20.97(n=17) |          |          |
| <b>VAS-F</b> | 18.65±27.63                          | 13.71±28.23 | 2.76±29.49 | 10.00±29.50 | 8.82±28.14  | 12.24±26.61 | 19.65±27.12 | 0.733    | 0.624    |
| <b>VFS</b>   | 20.00±7.66                           | 18.76±10.46 | 15.06±8.88 | 17.88±10.20 | 18.71±11.94 | 17.65±8.31  | 23.06±12.29 | 0.993    | 0.434    |

**Table S2.** Data for Figure 10, Trends in VAS–F and VFS questionnaire scores in stepped horizontal parallax conditions.

|              | Differences Parallax (Mean ± standard deviation) |             |             |             |             |             |             | <i>F</i> | <i>p</i> |
|--------------|--------------------------------------------------|-------------|-------------|-------------|-------------|-------------|-------------|----------|----------|
|              | 0.0(n=17)                                        | 0.85(n=17)  | 1.65(n=17)  | 2.45(n=17)  | 3.31(n=17)  | 4.05(n=17)  | 4.64(n=17)  |          |          |
| <b>VAS-F</b> | 6.53±36.17                                       | -4.76±32.53 | 5.24±38.67  | 10.12±32.27 | 11.71±35.41 | 14.00±42.52 | 18.88±38.36 | 0.716    | 0.637    |
| <b>VFS</b>   | 24.12±21.53                                      | 19.41±17.00 | 24.35±20.07 | 25.24±20.10 | 27.82±22.12 | 31.47±22.50 | 32.76±21.34 | 0.842    | 0.540    |

**Table S3.** Data for Figure 11, Trends in total performance and error rate of D2 test task under horizontal overall horizontal parallax conditions.

|             | Parallax (Mean ± standard deviation) |              |              |              |              |              |               | <i>F</i> | <i>p</i> |
|-------------|--------------------------------------|--------------|--------------|--------------|--------------|--------------|---------------|----------|----------|
|             | 0.0(n=17)                            | 1.65(n=17)   | 3.31(n=17)   | 6.24(n=17)   | 10.61(n=17)  | 13.67(n=17)  | 20.97(n=17)   |          |          |
| <b>TN-E</b> | 567.24±71.59                         | 578.41±84.22 | 572.00±83.33 | 568.12±60.48 | 560.88±91.43 | 573.71±81.42 | 483.35±137.02 | 2.323    | 0.038    |
| <b>E</b>    | 3.56±2.69                            | 3.64±3.03    | 3.58±3.25    | 4.77±5.55    | 6.04±7.25    | 6.51±8.47    | 13.25±12.22   | 4.291    | 0.001    |

**Table S4.** Data for Figure 12 and Figure 13, Stepped horizontal parallax D2 test task analysis results

|            | Differences Parallax Median M(P25, P75) |                          |                          |                          |                          |                          |                          | Kruskal–Wallis<br>test statistic<br><i>H-value</i> | <i>p</i> |
|------------|-----------------------------------------|--------------------------|--------------------------|--------------------------|--------------------------|--------------------------|--------------------------|----------------------------------------------------|----------|
|            | 0(n=17)                                 | 0.85(n=17)               | 1.65(n=17)               | 2.45(n=17)               | 3.31(n=17)               | 4.05(n=17)               | 4.64(n=17)               |                                                    |          |
| <b>TNE</b> | 627.00<br>(611.5, 652.5)                | 635.00<br>(599.5, 650.0) | 632.00<br>(583.0, 645.5) | 620.00<br>(589.5, 641.0) | 612.00<br>(563.0, 635.0) | 565.00<br>(506.5, 614.0) | 514.00<br>(477.5, 567.0) | 43.342                                             | 0.000**  |
| <b>E1</b>  | 1.38<br>(0.5, 2.9)                      | 1.64<br>(0.9, 2.7)       | 1.680<br>(0.8, 2.8)      | 1.58<br>(1.2, 4.6)       | 2.76<br>(1.5, 7.3)       | 7.750<br>(3.3, 10.8)     | 11.30<br>(3.2, 14.2)     | 38.112                                             | 0.000**  |
| <b>E2</b>  | 0.18<br>(0.1, 0.5)                      | 0.31<br>(0.1, 0.5)       | 0.30<br>(0.1, 0.7)       | 0.34<br>(0.1, 1.2)       | 0.52<br>(0.1, 2.0)       | 1.67<br>(0.5, 4.1)       | 1.76<br>(0.6, 5.8)       | 30.650                                             | 0.000**  |
| <b>CP</b>  | 180.00<br>(175.0, 197.5)                | 185.00<br>(170.5, 194.0) | 180.00<br>(165.5, 191.0) | 176.00<br>(159.5, 188.5) | 165.00<br>(128.5, 184.5) | 129.00<br>(96.0, 168.0)  | 92.00<br>(66.0, 161.0)   | 45.950                                             | 0.000**  |

\* p&lt;0.05, \*\* p&lt;0.01

**Table S5.** Data for Figure 14 and Figure 15, Error rate vs. parallax step value of the fitted raw data

| Differences<br>Parallax (mrad) | 0     | 0.85  | 1.65  | 2.45  | 3.31  | 4.05   | 4.64   |
|--------------------------------|-------|-------|-------|-------|-------|--------|--------|
| <b>E1</b>                      | 1.380 | 1.640 | 1.680 | 1.580 | 2.760 | 7.750( | 11.300 |
| <b>E2</b>                      | 0.180 | 0.310 | 0.300 | 0.340 | 0.520 | 1.670  | 1.760  |

**Table S6.** Data for Figure 16, Trends in VAS–F and VFS fatigue evaluation scores under different vertical parallax conditions.

|              | Parallax (Mean ± standard deviation) |             |             |             |             |             |             | <i>F</i> | <i>p</i> |
|--------------|--------------------------------------|-------------|-------------|-------------|-------------|-------------|-------------|----------|----------|
|              | 0.0(n=17)                            | 2.24(n=17)  | 4.05(n=17)  | 6.61(n=17)  | 8.96(n=17)  | 12.27(n=17) | 15.15(n=17) |          |          |
| <b>VAS-F</b> | 2.18±33.85                           | -3.35±33.64 | 5.35±41.10  | 4.65±42.27  | 7.35±39.72  | 10.00±39.11 | 2.47±36.12  | 0.213    | 0.972    |
| <b>VFS</b>   | 14.59±12.48                          | 16.41±13.75 | 17.88±16.19 | 17.76±16.39 | 19.47±17.17 | 18.65±16.34 | 18.65±14.71 | 0.195    | 0.978    |

**Table S7.** Data for Figure 17, Trends in VAS–F and VFS questionnaire scores in stepped vertical parallax conditions.

|              | Differences Parallax (Mean ± standard deviation) |             |             |             |             |             |             | <i>F</i> | <i>p</i> |
|--------------|--------------------------------------------------|-------------|-------------|-------------|-------------|-------------|-------------|----------|----------|
|              | 0.0(n=17)                                        | 0.53(n=17)  | 1.71(n=17)  | 2.24(n=17)  | 2.88(n=17)  | 3.41(n=17)  | 4.05(n=17)  |          |          |
| <b>VAS-F</b> | 19.35±41.41                                      | 28.29±40.73 | 27.76±42.26 | 25.94±38.89 | 31.24±43.38 | 28.00±44.51 | 26.12±45.66 | 0.127    | 0.993    |
| <b>VFS</b>   | 25.12±19.25                                      | 26.94±18.84 | 26.06±17.23 | 28.76±14.01 | 30.71±18.27 | 29.71±17.12 | 30.29±20.33 | 0.254    | 0.957    |

**Table S8.** Data for Figure 18, Stepped vertical parallax D2 test task analysis result

|           | Differences Parallax Median M(P25, P75) |                          |                          |                          |                          |                          |                          | <i>Kruskal–Wallis<br/>test statistic<br/>H-value</i> | <i>p</i> |
|-----------|-----------------------------------------|--------------------------|--------------------------|--------------------------|--------------------------|--------------------------|--------------------------|------------------------------------------------------|----------|
|           | 0(n=17)                                 | 0.53(n=17)               | 1.71(n=17)               | 2.24(n=17)               | 2.88(n=17)               | 3.41(n=17)               | 4.05(n=17)               |                                                      |          |
| <b>CP</b> | 180.000<br>(159.0,186.5)                | 167.000<br>(155.0,188.0) | 174.000<br>(151.5,184.5) | 165.000<br>(149.0,178.0) | 157.000<br>(136.0,168.5) | 157.000<br>(141.0,164.5) | 146.000<br>(129.0,176.5) | 14.293                                               | 0.027*   |
| <b>FR</b> | 5.000<br>(0.0,8.0)                      | 6.000<br>(0.0,9.0)       | 4.000<br>(0.0,9.5)       | 6.000<br>(0.0,9.5)       | 8.000<br>(1.0,10.5)      | 9.000<br>(2.5,13.5)      | 12.000(<br>7.5,19.5)     | 15.079                                               | 0.020*   |

\* p<0.05
